# Supplementary material for: Cobaltabis(dicarbollide) [ o -COSAN] − loaded apoferritin: an innovative high-capacity boron delivery system to target tumour cells for BNCT applications
Source: Royal Society of Chemistry journal article supplement (doi:10.1039/d5nr00362h), 2025-01-01
Supplement: d5nr00362h1.pdf [file d5nr00362h1.pdf]

**Cobaltabis(dicarbollide) ([o-COSAN]-) loaded apoferritin:  
an innovative high-capacity boron delivery system to target tumour  
cells for BNCT applications.**

D. Alberti <sup>a</sup>, J. N. Piña Marcos <sup>a</sup>, S. Rakhshan <sup>a</sup>, N. Protti<sup>b,c</sup>, S. Altieri<sup>b,c</sup>, M. Nuez-Martínez<sup>d</sup>, F. Teixidor<sup>d</sup>, C. Viñas<sup>d</sup>, S. Geninatti Crich <sup>a \*</sup>

*a Department of Molecular Biotechnology and Health Sciences, University of Torino, Via Nizza, 52, 10126, Turin, Italy*

*b Department of Physics, University of Pavia, Via Agostino Bassi 6, 27100, Pavia, Italy*

*c Nuclear Physics National Institute (INFN), Unit of Pavia, Via Agostino Bassi 6, 27100, Pavia, Italy*

*d Institut de Ciència de Materials de Barcelona (ICMAB-CSIC), Campus UAB, 08193 Bellaterra, Spain*

## Supporting Information

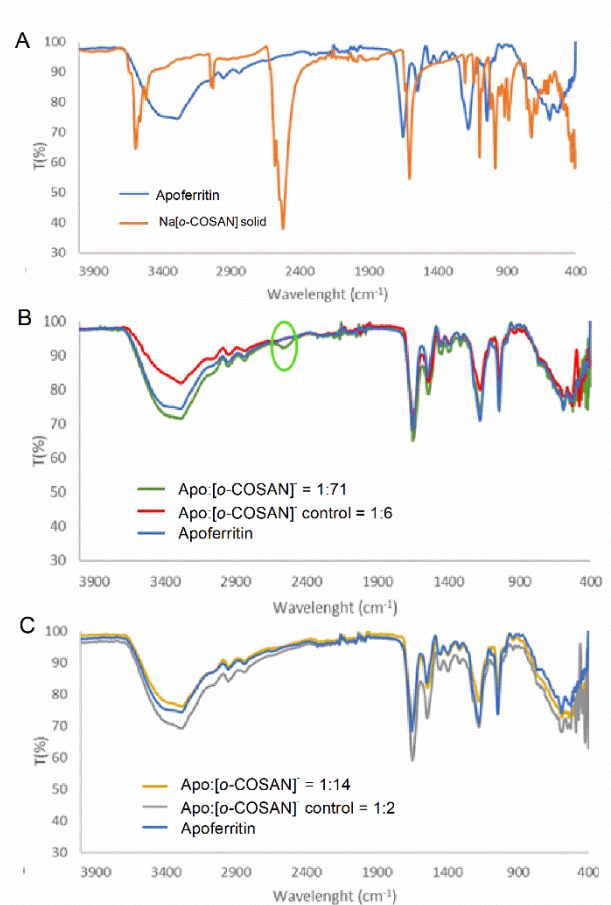

**Figure S1.** A) IR spectra of apoferritin and the Na[o-COSAN] in solid state as references. B) FT-IR spectra of Apoferritin as a reference (in blue), the nanohybrid Apo:[o-COSAN]<sup>-</sup> prepared via the dissociation method at acidic pH=2 at ratio 1:71 (in green), and the control nanohybrid Apo:[o-COSAN]<sup>-</sup> at ratio 1:6 (in red), both incubated at a ratio 1:88. C) FT-IR spectra of apoferritin as a reference (in blue), the nanohybrid Apo:[o-COSAN]<sup>-</sup> prepared via the dissociation method at acidic pH=2 at ratio 1:14 (in orange), and the control nanohybrid Apo:[o-COSAN]<sup>-</sup> at ratio 1:2 (in grey), both prepared at 1:18 ratio.

**Table S1:** Student *t*-test statistical analysis based on AB22 uptake results shown in Figure 6A. In red, not significant (ns) *p* > 0.05.

| AB22 uptake 16h               | Apo:[o-COSAN] <sup>-</sup> / 10μM | Apo:[o-COSAN] <sup>-</sup> / 20μM | Apo:[o-COSAN] <sup>-</sup> / 50μM |
|-------------------------------|-----------------------------------|-----------------------------------|-----------------------------------|
| [o-COSAN] <sup>-</sup> / 10μM | 0.5422                            |                                   |                                   |
| [o-COSAN] <sup>-</sup> / 20μM |                                   | 0.4050                            |                                   |
| [o-COSAN] <sup>-</sup> / 50μM |                                   |                                   | 0.7168                            |

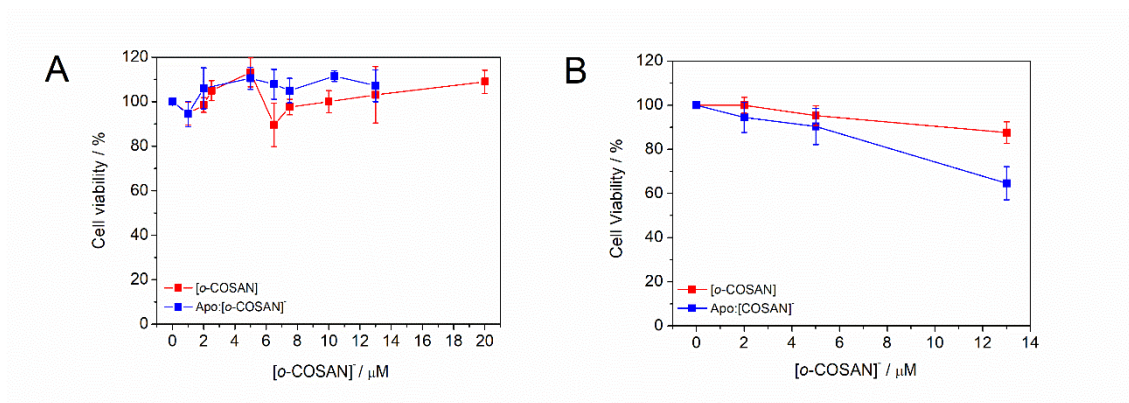

**Figure S2:** Percentage of viable cells measured by Bradford assay after incubation of MCF7 cells for 6h (A) or 16h (B) with increasing concentration of Apo:[o-COSAN]<sup>-</sup> nanohybrid (blue) or free [o-COSAN]<sup>-</sup> molecules (red).

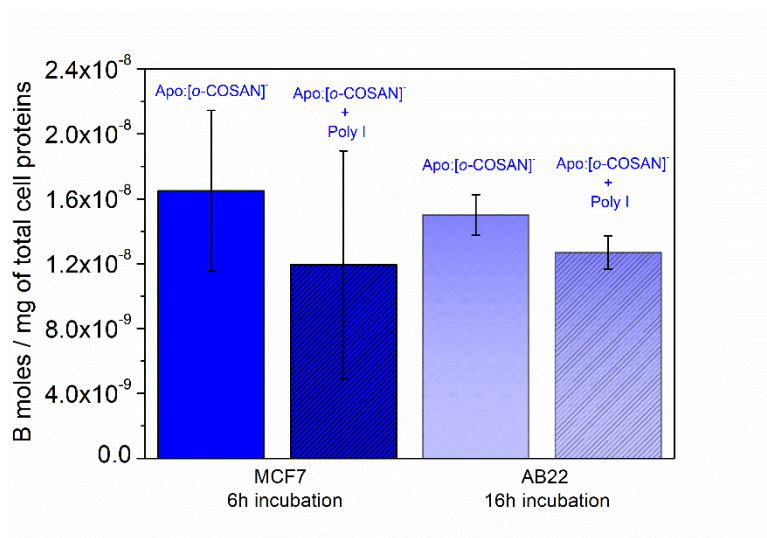

**Figure S3:** competition studies: boron uptake by MCF7 cells after 6 h incubation and AB22 cells after 16h incubation in the presence of 20  $\mu\text{M}$  Apo:[o-COSAN]<sup>-</sup> nanohybrid without and with the addition of 0.1 mg/mL of polyinosinic acid.

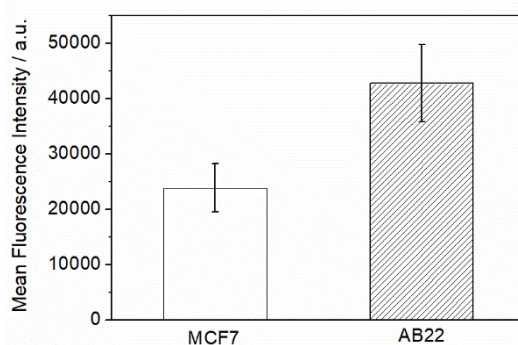

**Figure S4:** Quantification of SCARA5 expression by ImageJ software on acquired images by Leica STELLARIS 8 confocal microscope.

**Table S2:** Student *t*-test statistical analysis based on results shown in Figure 7A and B. In red, not significant

| Cell viability<br>24h after<br>Neutron<br>Irradiation | [o-COSAN] <sup>-</sup> | Apo:[o-COSAN] <sup>-</sup> | CTRL IRR | [o-COSAN] <sup>-</sup> IRR | Apo:[o-COSAN] <sup>-</sup> IRR |
|-------------------------------------------------------|------------------------|----------------------------|----------|----------------------------|--------------------------------|
| CTRL                                                  | 0.7970                 | 0.0547                     | 0.1734   | 0.3838                     | 0.0611                         |
| [o-COSAN] <sup>-</sup>                                |                        | 0.0014                     | 0.0168   | 0.0481                     | 0.0026                         |
| Apo:[o-COSAN] <sup>-</sup>                            |                        |                            | 0.0025   | 0.0032                     | 0.3276                         |
| CTRL IRR                                              |                        |                            |          | 0.0103                     | 0.0030                         |
| [o-COSAN] <sup>-</sup> IRR                            |                        |                            |          |                            | 0.0055                         |
| Clonogenic<br>assay                                   | [o-COSAN] <sup>-</sup> | Apo:[o-COSAN] <sup>-</sup> | CTRL IRR | [o-COSAN] <sup>-</sup> IRR | Apo:[o-COSAN] <sup>-</sup> IRR |
| CTRL                                                  | 0.4741                 | 0.7395                     | 0.0021   | 0.0002                     | 0.0004                         |
| [o-COSAN] <sup>-</sup>                                |                        | 0.2682                     | 0.0014   | <0.0001                    | 0.0002                         |
| Apo:[o-COSAN] <sup>-</sup>                            |                        |                            | 0.0014   | <0.0001                    | 0.0003                         |
| CTRL IRR                                              |                        |                            |          | 0.1631                     | 0.0076                         |
| [o-COSAN] <sup>-</sup> IRR                            |                        |                            |          |                            | 0.0076                         |

(ns)  $p > 0.05$ , in yellow  $*p \leq 0.05$ , in orange  $**p \leq 0.01$  and in green  $***p \leq 0.001$ .

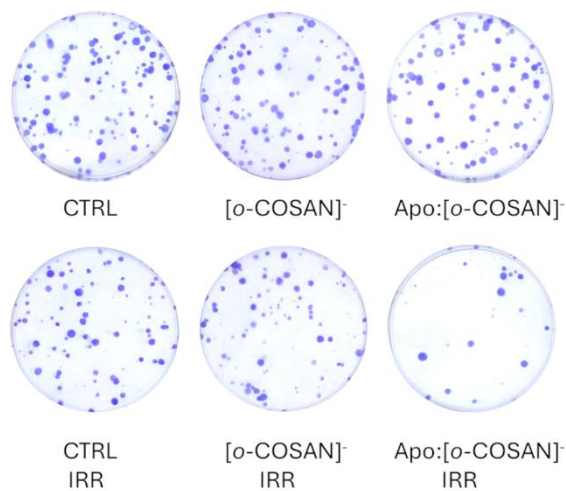

**Figure S5:** Representative images of clonogenic assay performed at day 10 after Neutron Irradiation.
